# Supplementary material for: Synthesis and photoresponsive properties of two liquid crystalline polymers bearing branched azobenzene-containing side chains
Source: Royal Society of Chemistry journal article supplement (doi:10.1039/c3py00757j), 2013-01-01
Supplement: c3py00757j.pdf [file c3py00757j.pdf]

# Synthesis and Photoresponsive Properties of Two Liquid Crystalline Polymers Bearing Branched Azobenzene-Containing Side Chains

Yu Zhu, Xiaogong Wang\*

Department of Chemical Engineering, Laboratory of Advanced  
Materials (MOE), Tsinghua University, Beijing, P. R. China 100084

## Supporting information

The  $^1\text{H}$  NMR spectra of the intermediate products are given in figure S1-S5.

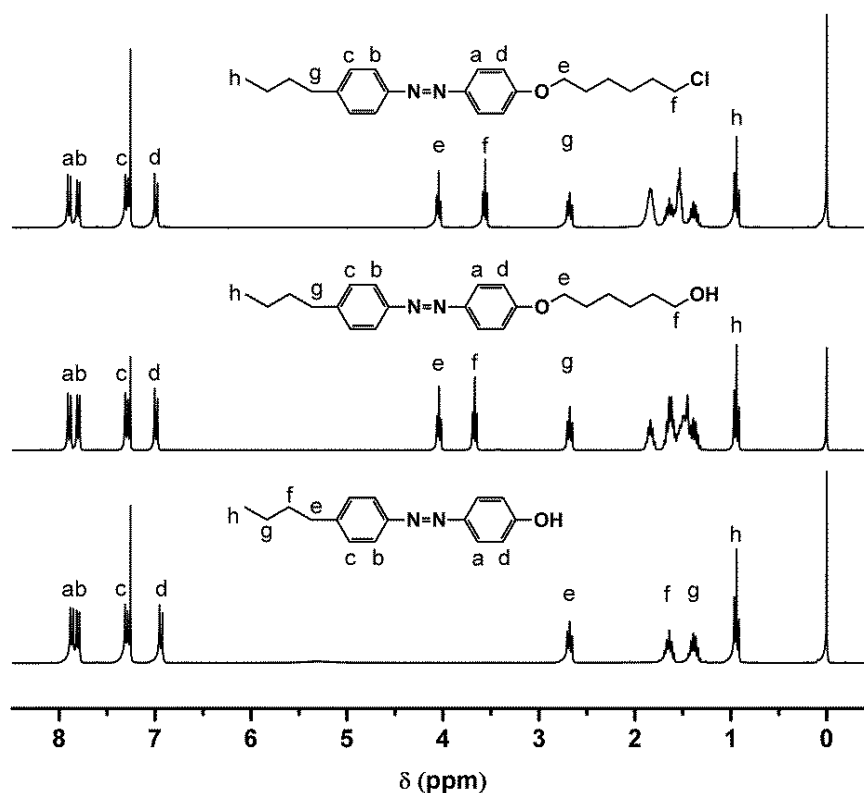

**Figure S1.**  $^1\text{H}$  NMR spectra of **Compound 1-3**

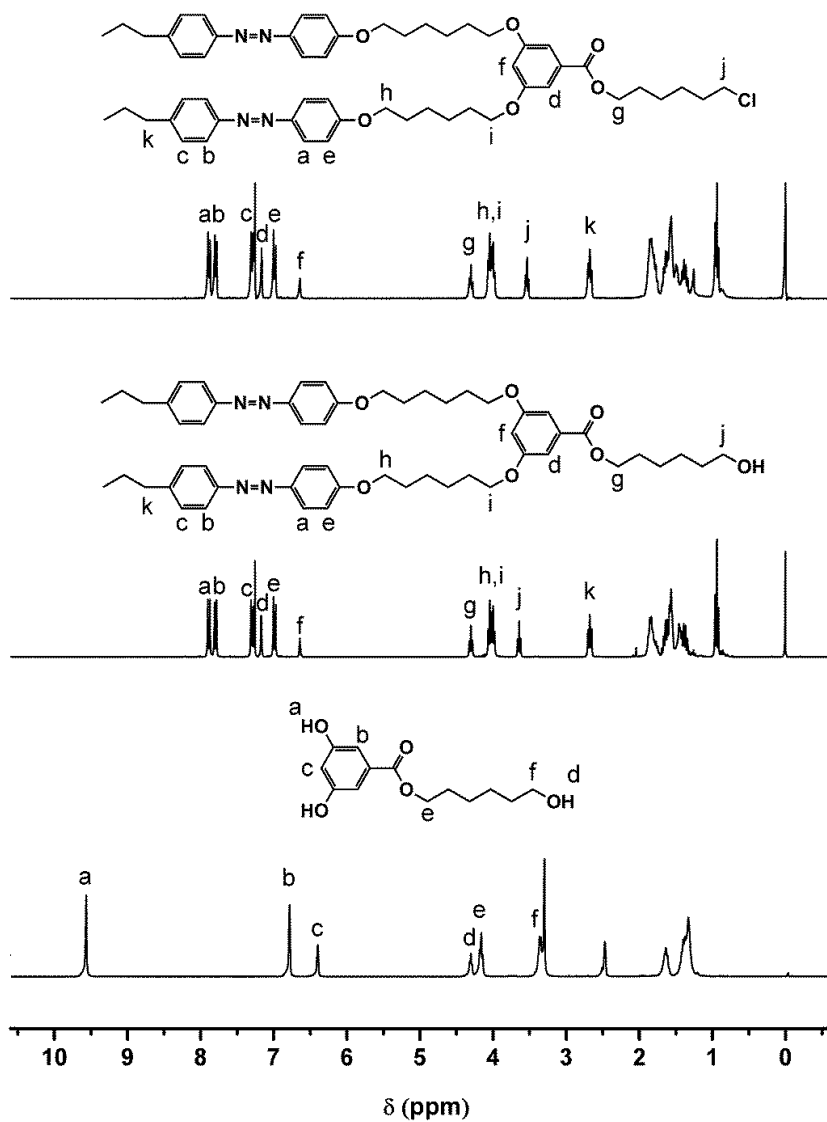

**Figure S2.**  $^1\text{H}$  NMR spectra of **Compound 5-7**

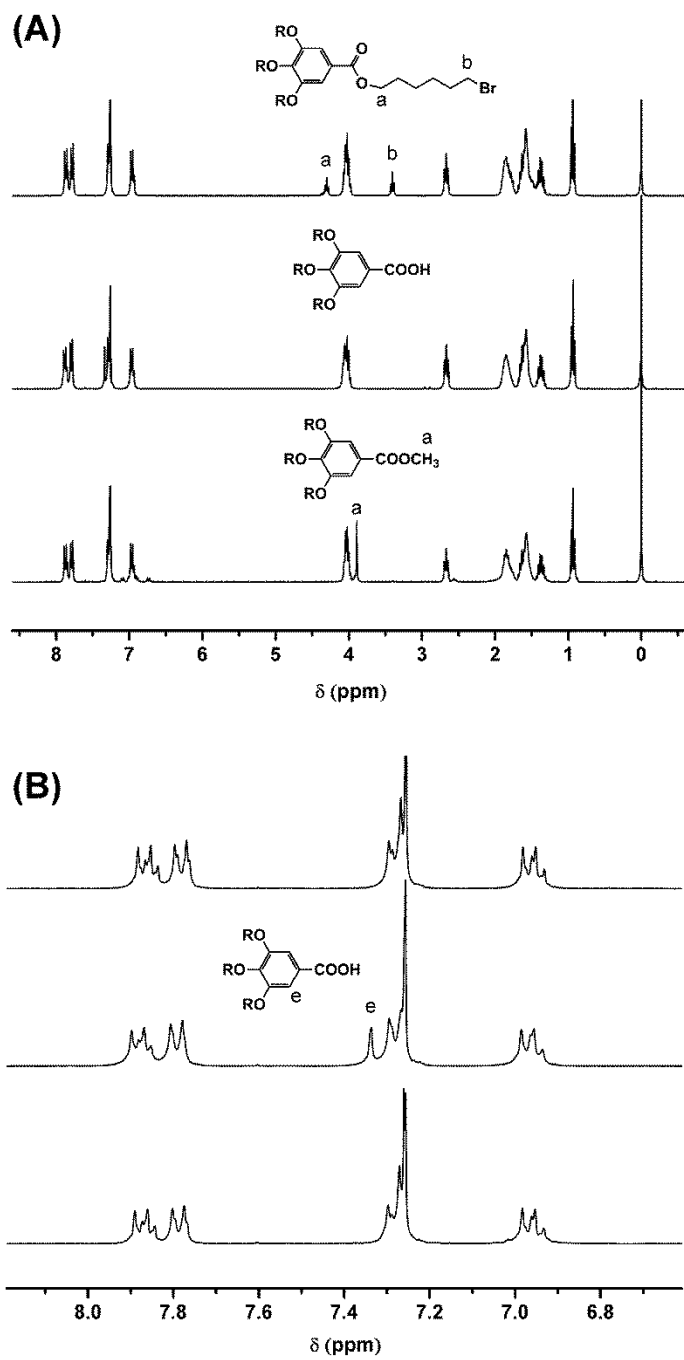

**Figure S3.**  $^1\text{H}$ NMR spectra of **compound 10-12**

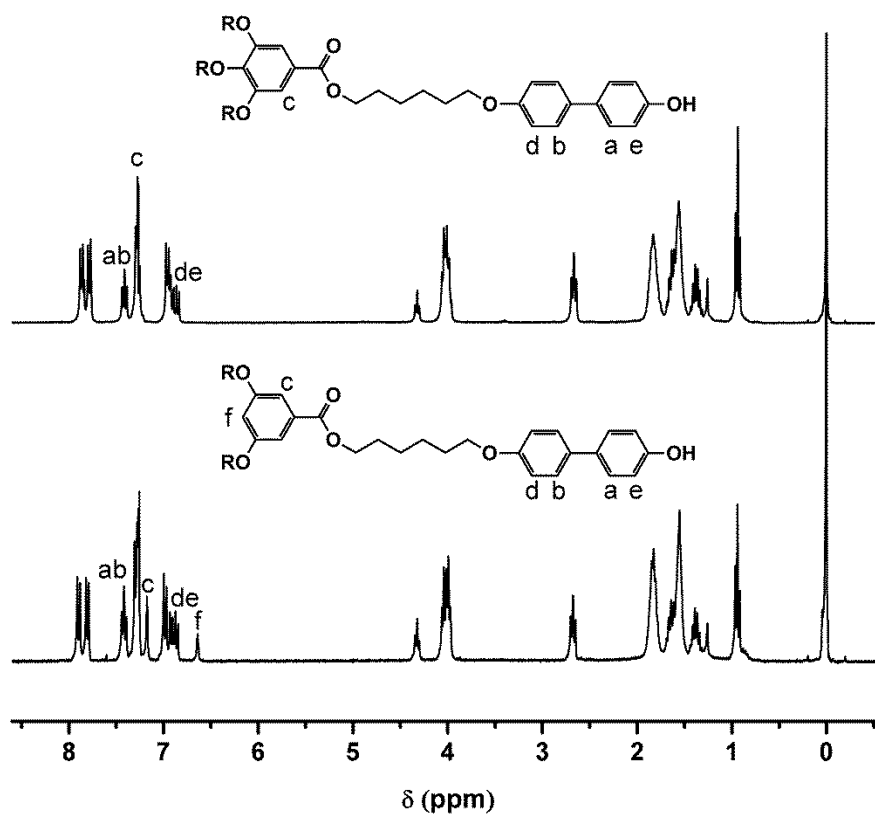

**Figure S4.**  $^1\text{H}$  NMR spectra of **Compound 8&13**

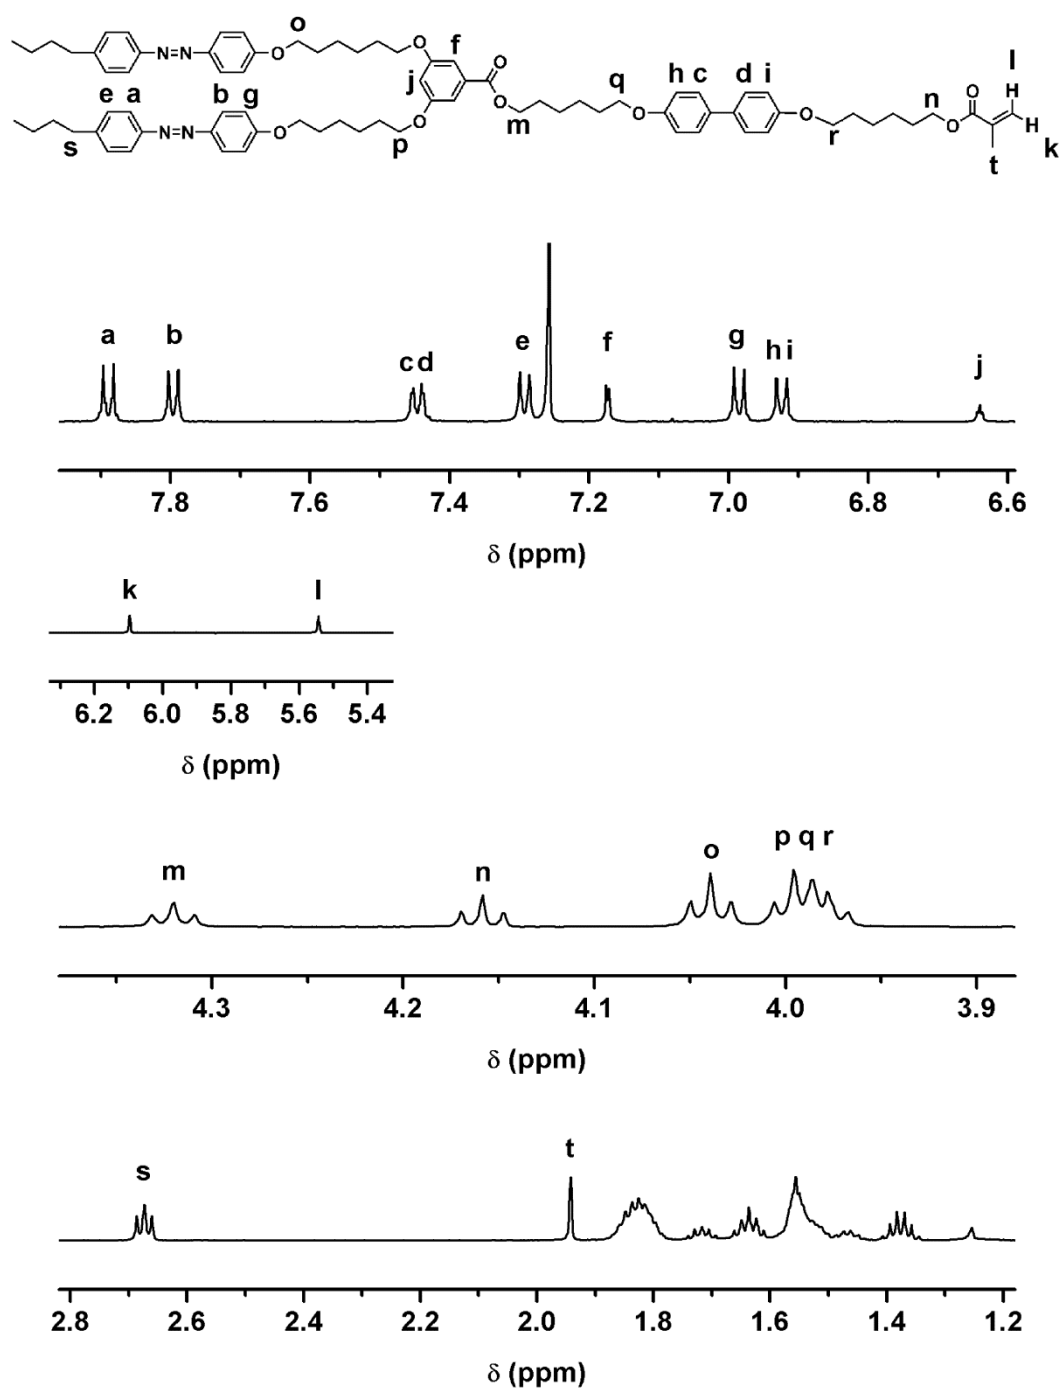

Figure S5. <sup>1</sup>H NMR spectra of monomer 2ABMA

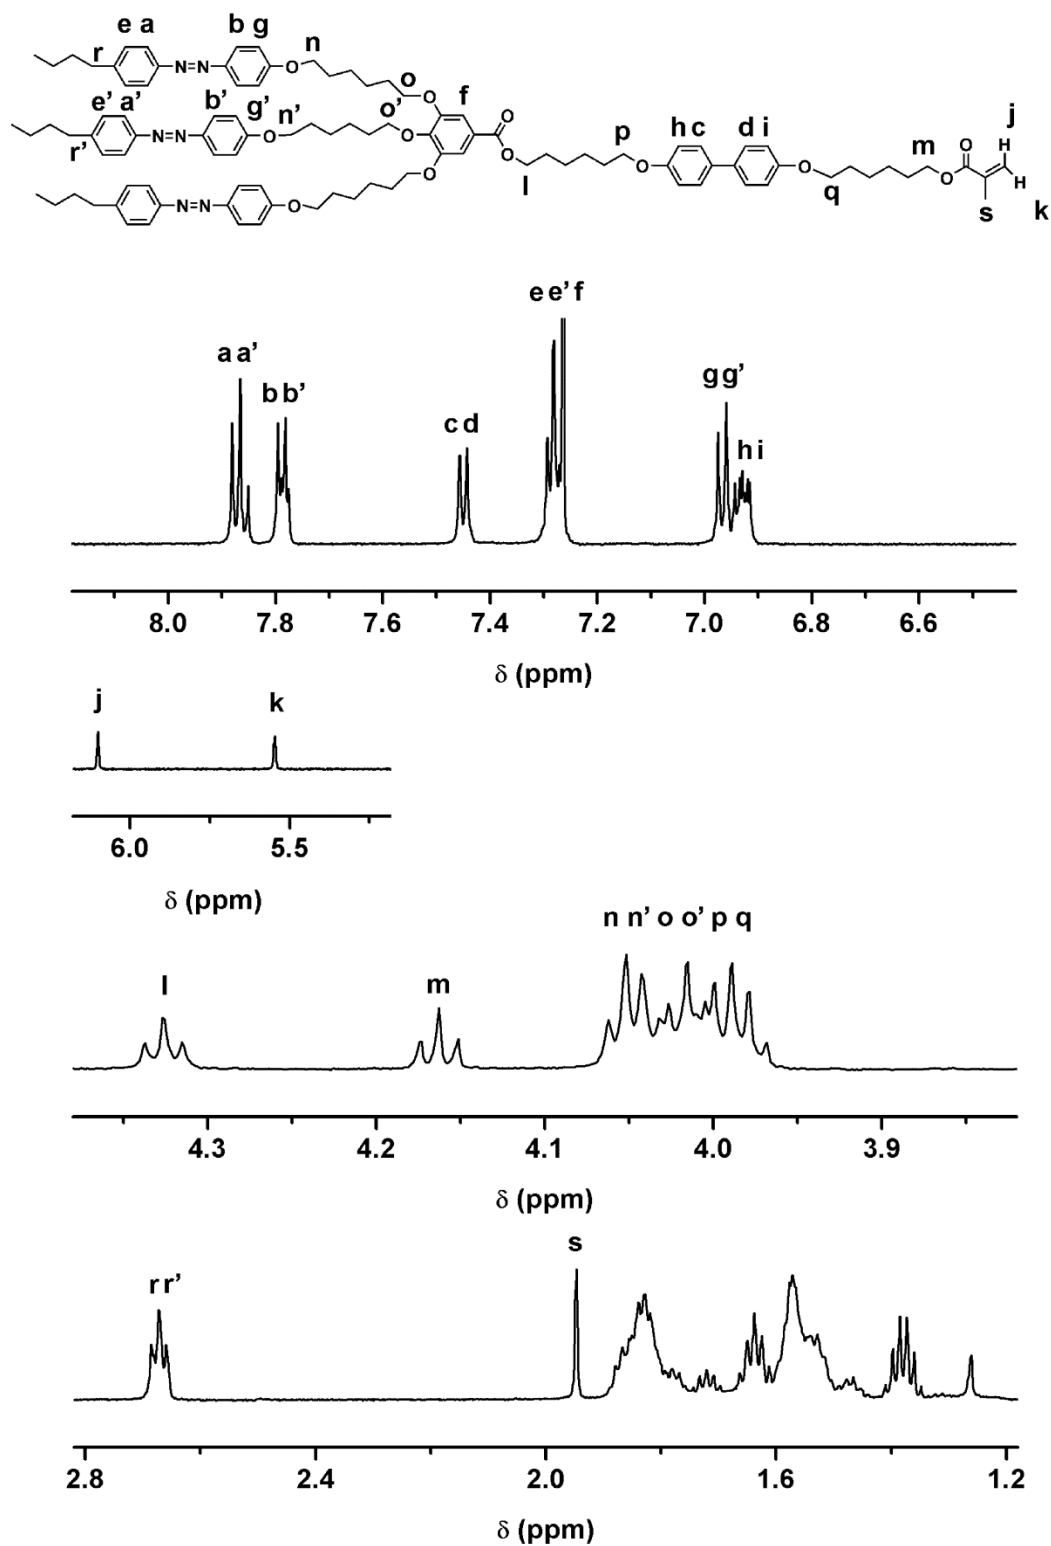

**Figure S6.** <sup>1</sup>H NMR spectra of monomer 3ABMA

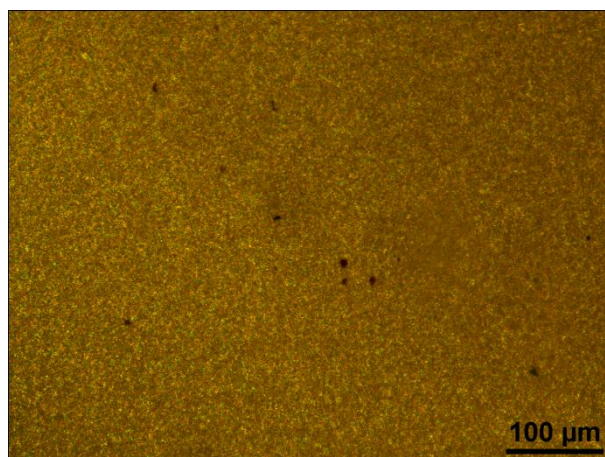

**Figure S7.** POM image of the polymer P2ABMA at 120°C

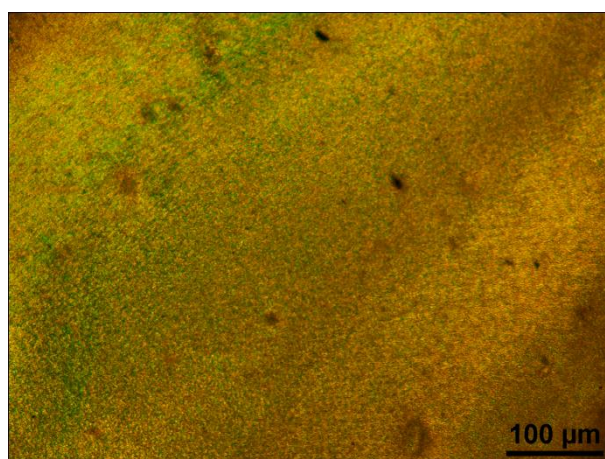

**Figure S8.** POM image of the polymer P3ABMA at 120°C
